# Supplementary material for: Detecting anomalous electricity consumption with transformer and synthesized anomalies
Source: PeerJ journal article supplement (doi:10.7717/peerj-cs.1721), 2023-12-04
Supplement: code.zip [file code.zip]

## Instructions for the code

*data/* → directory for the experimental data.

*figures/* → directory for storing figures.

*transformer\_detector.py* → the Transformer model for detecting anomalous electricity consumption

*cal\_metrics.py* → the script for calculating the evaluation metrics.

*plt\_ablation\_results.py*

*plt\_anomaly\_types.py*

*plt\_roc.py*

*plt\_ts\_input.py* → the scripts for plotting figures in the paper.
